# Supplementary material
Source: MDPI journal article supplement (https://www.mdpi.com/2227-9040/10/10/402)
Supplement: s1 [file s1]

## Supplementary Materials

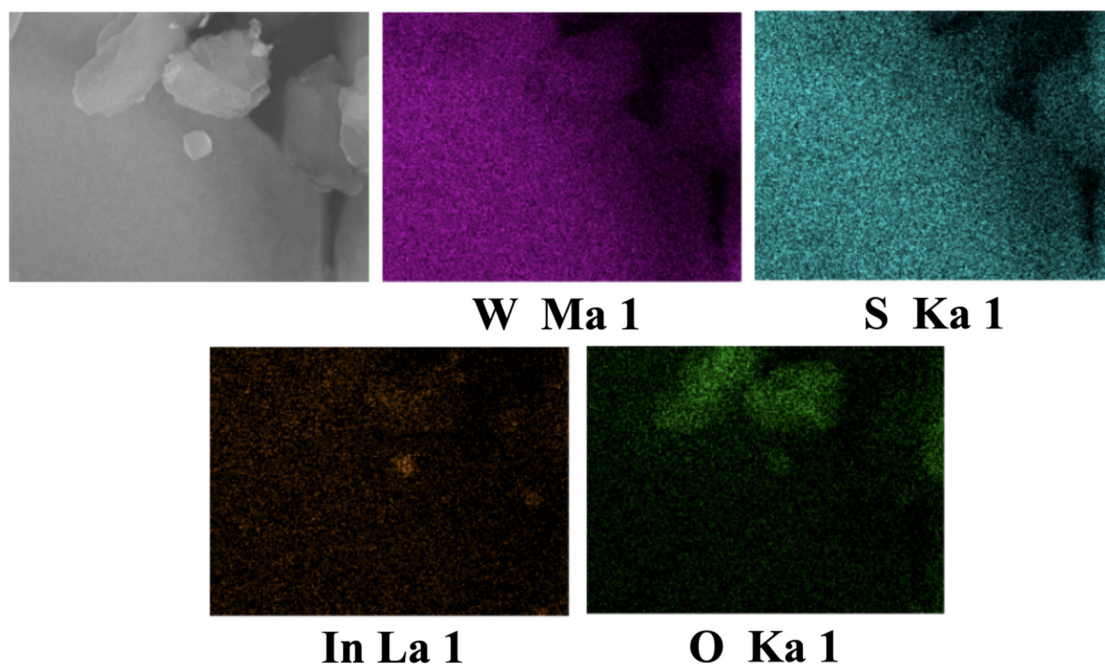

Figure S1. Elemental distribution of IO/WS<sub>2</sub>-1 heterostructure nanocomposites based sensor.

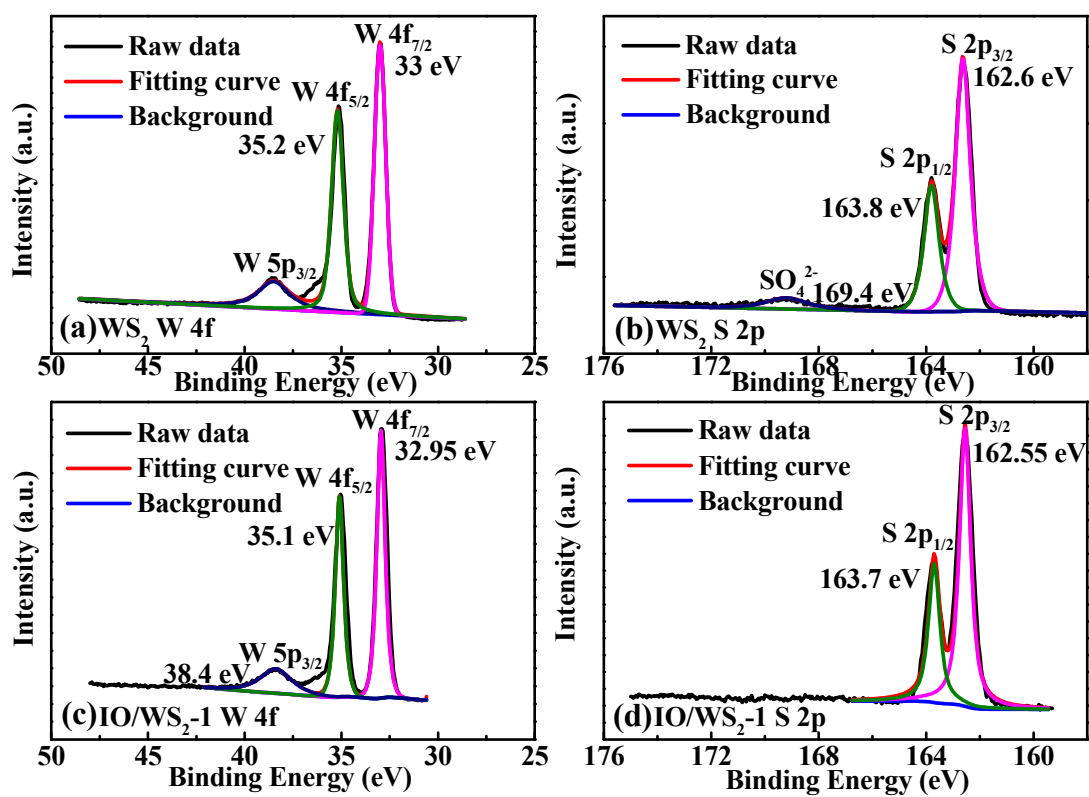

Figure S2. (a,b) W 4f and S 2p refined core spectra of WS<sub>2</sub>, (c,d) W 4f and S 2p refined core spectra of IO/WS<sub>2</sub>-1 heterostructures nanocomposites based sensor.

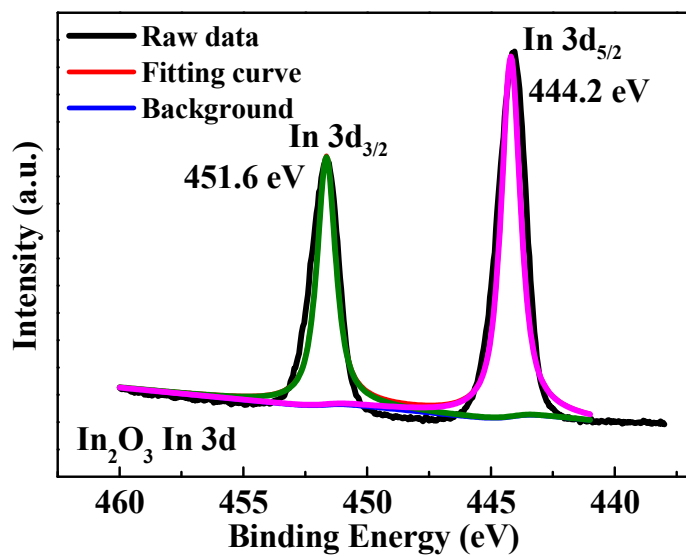

Figure S3. In 3d refined core spectra of In<sub>2</sub>O<sub>3</sub>.

Table S1. The relative concentrations of each element in IO/WS<sub>2</sub>-1 heterostructure nanocomposites based sensor.

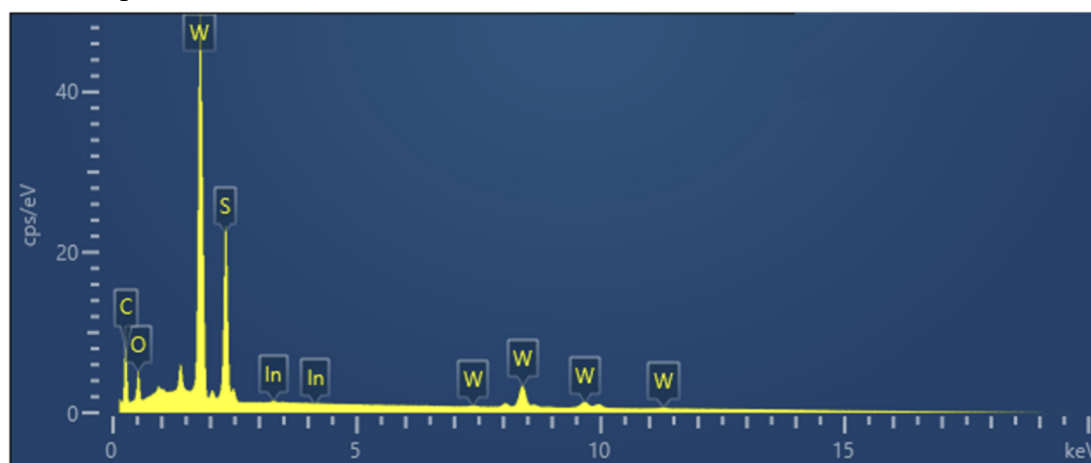

| Elements | Type of line | Weight percentage | Wt% Sigma | Atomic percentage |
|----------|--------------|-------------------|-----------|-------------------|
| C        | K            | 30.35             | 0.23      | 70.93             |
| O        | K            | 4.33              | 0.07      | 7.59              |
| S        | K            | 15.88             | 0.08      | 13.90             |
| In       | L            | 0.32              | 0.05      | 0.08              |
| W        | M            | 49.12             | 0.18      | 7.50              |

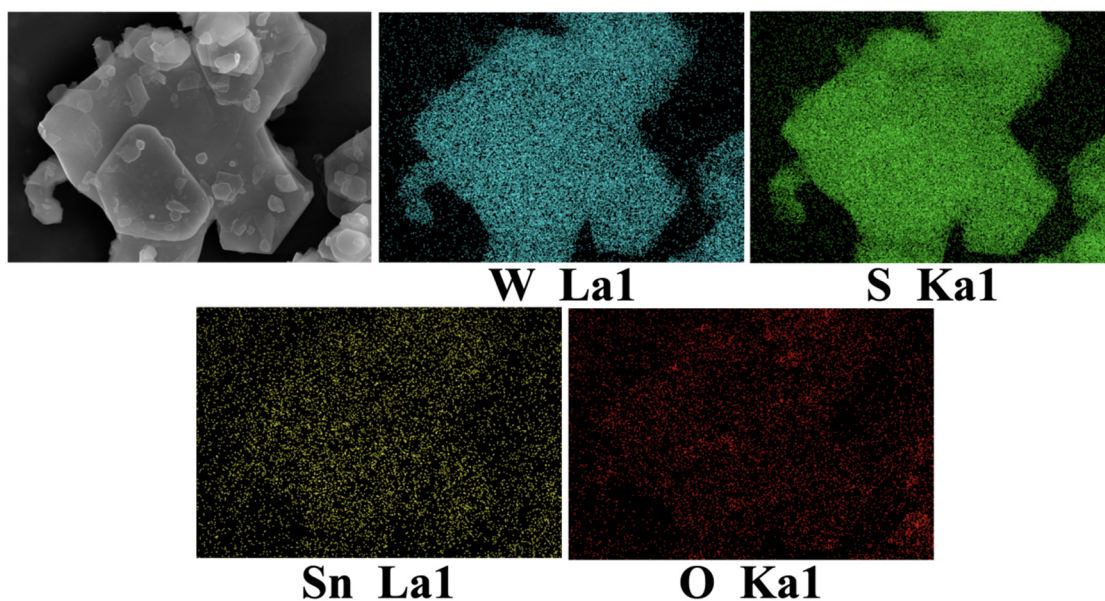

Figure S4. Elemental distribution of SnO<sub>2</sub>/WS<sub>2</sub>-1 heterostructure nanocomposites based sensor.

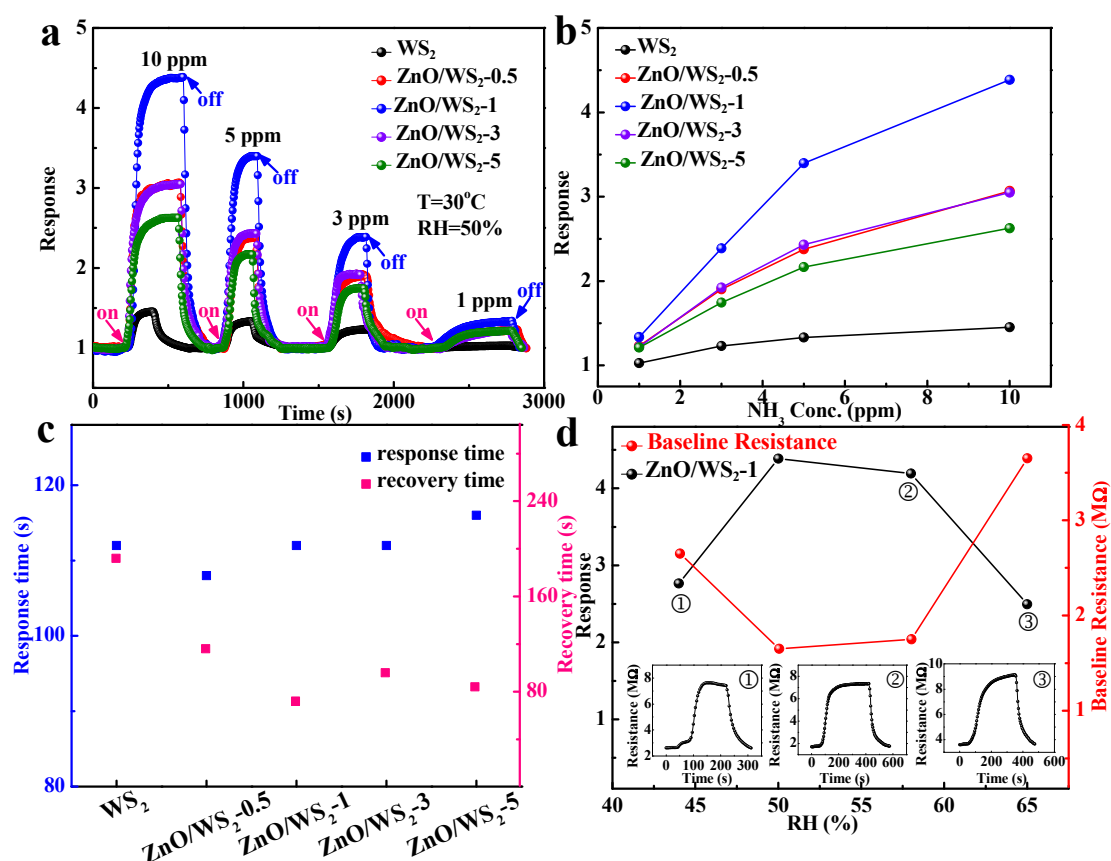

Figure S5. (a, b) Response curves and response values of WS<sub>2</sub> and ZnO/WS<sub>2</sub> heterostructure nanocomposites based sensors to different concentrations of ammonia at room temperature, (c) response/recovery time of WS<sub>2</sub> and ZnO/WS<sub>2</sub> heterostructure nanocomposites based sensors to 10 ppm ammonia at room temperature, (d) relationship between ZnO/WS<sub>2</sub>-1 heterostructure nanocomposites based sensor's

response/baseline resistance and humidity.

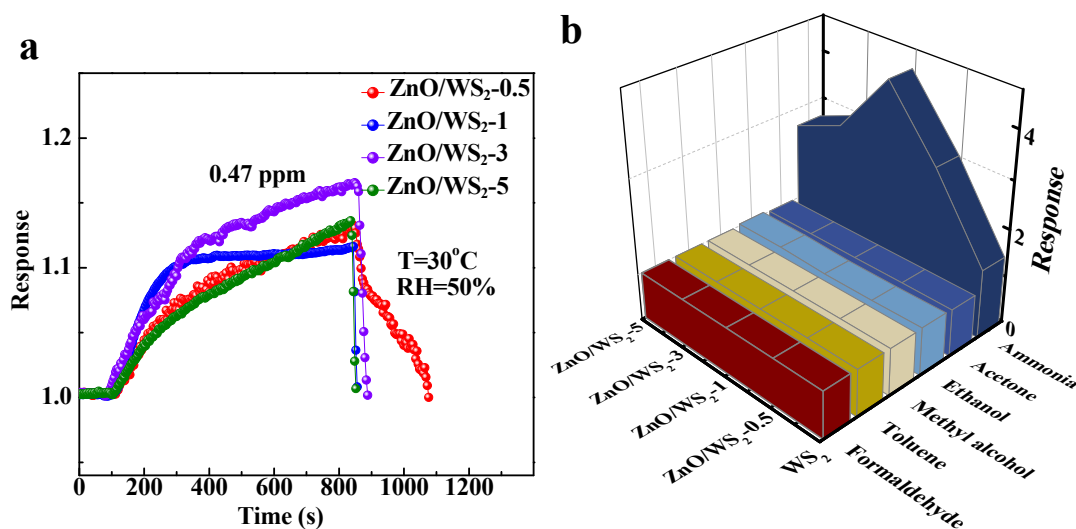

Figure S6. (a). The response curve of the prepared ZnO/WS<sub>2</sub> heterostructure nanocomposites based sensors to 0.47 ppm ammonia at room temperature, (b) the selectivity of the WS<sub>2</sub> and ZnO/WS<sub>2</sub> heterostructure nanocomposites based sensors to different gases at room temperature.

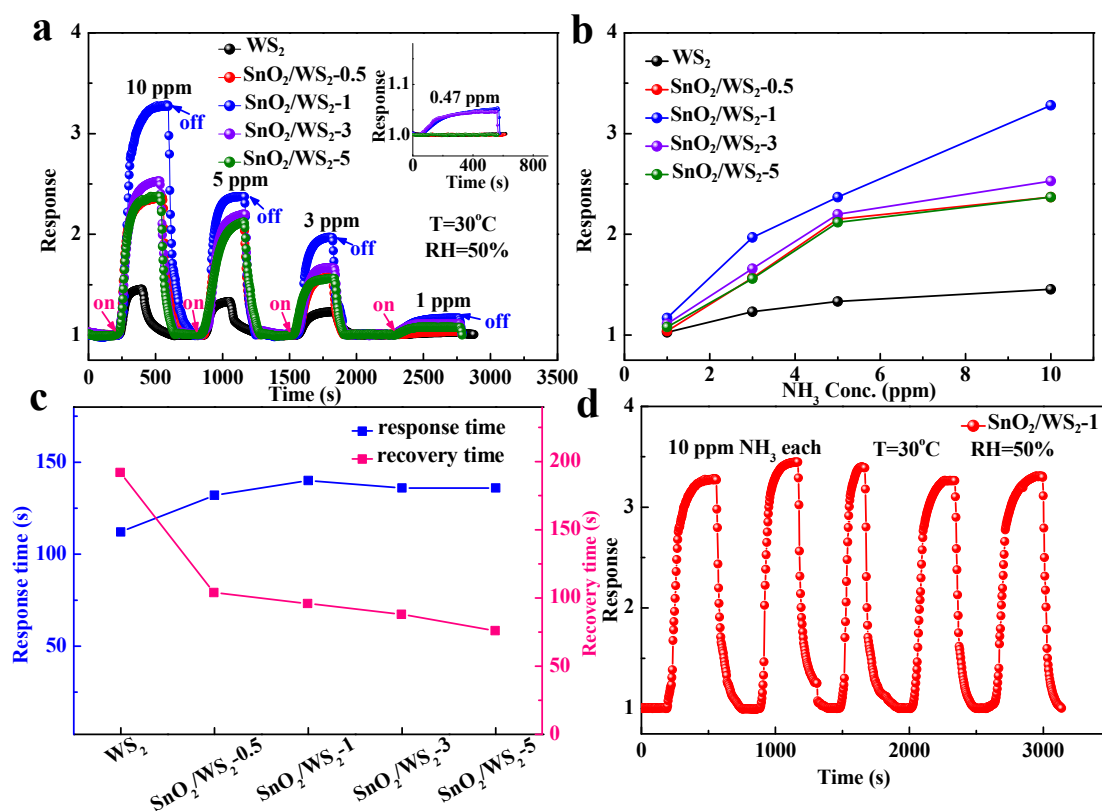

Figure S7. (a,b) Response curves and values of WS<sub>2</sub> microflakes based sensor and SnO<sub>2</sub>/WS<sub>2</sub> heterostructure nanocomposites based sensors to different concentrations of ammonia at room temperature, (c) response/recovery time of the SnO<sub>2</sub>/WS<sub>2</sub> heterostructure nanocomposites based sensors to 10 ppm ammonia at room temperature, (d) repeatability of SnO<sub>2</sub>/WS<sub>2</sub>-1 heterostructure nanocomposites based sensor.

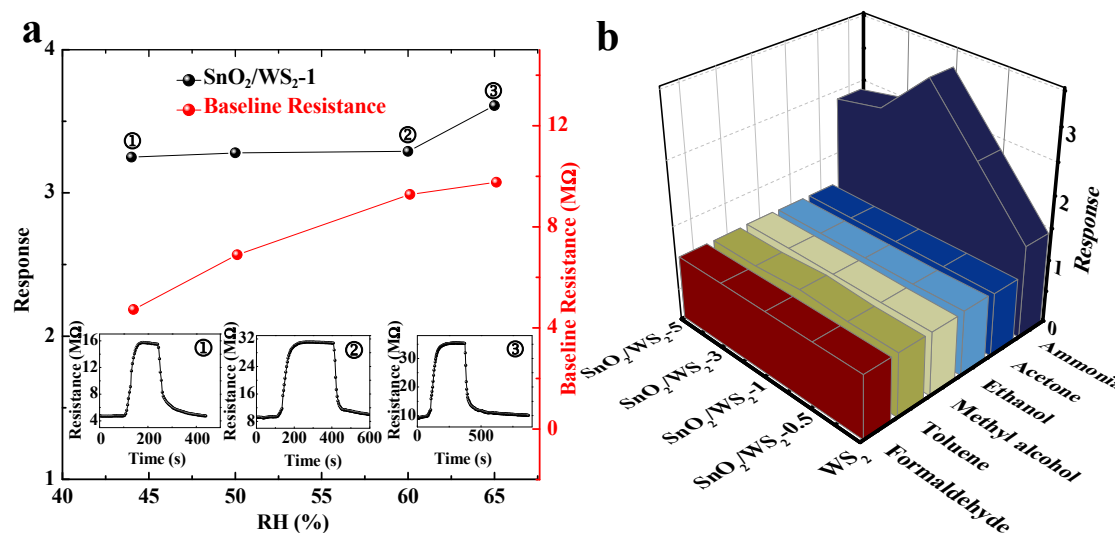

Figure S8. (a) The relationship between the response/baseline resistance and humidity of SnO<sub>2</sub>/WS<sub>2</sub>-1 heterostructure nanocomposites based sensor, (b) selectivity of the WS<sub>2</sub> microflakes based sensor and SnO<sub>2</sub>/WS<sub>2</sub> heterostructure nanocomposites based sensors to different gases.
